# Supplementary material for: Proteomics Insights into the Gene Network of cis9, trans11-Conjugated Linoleic Acid Biosynthesis in Bovine Mammary Gland Epithelial Cells
Source: MDPI journal article supplement (doi:10.3390/ani12131718), 2022-07-02
Supplement: s1 [file s1]

**Supplementary Table S1.** Primer sequences for real-time polymerase chain reaction.

| Gene name                                                                                                                                                                                                                                                                                                                                                                                               | Accession number | Primer sequence (5'–3')                                       | References |
|---------------------------------------------------------------------------------------------------------------------------------------------------------------------------------------------------------------------------------------------------------------------------------------------------------------------------------------------------------------------------------------------------------|------------------|---------------------------------------------------------------|------------|
| $\beta$ -actin                                                                                                                                                                                                                                                                                                                                                                                          | NM_173979.3      | F: GCGTGGCTACAGCTTCACC<br>R: TTGATGTCACGGACGATTTC             | [23]       |
| SCD1                                                                                                                                                                                                                                                                                                                                                                                                    | NM_173959.4      | F: CCCTTTCCTTGAGCTGTCTG<br>R: ATGCTGACTCTCTCCCCTGA            |            |
| PGLS                                                                                                                                                                                                                                                                                                                                                                                                    | NM_001038580.1   | F:GTGGTTTCGGAGAGTCACTGATGG<br>R: TTCTGGGTGTGGGTCCTGATGG       |            |
| PFKL                                                                                                                                                                                                                                                                                                                                                                                                    | NM_001080244.2   | F:CCGCTGGATCTCTGTCTTCATCTTC<br>R:CCTGGCTACTGTGACTGGCATTG      | [23]       |
| ALDOA                                                                                                                                                                                                                                                                                                                                                                                                   | NM_001101915.1   | F: GTTGCGTGCTGAAGATCGGG<br>R: CTCCACGATGGGCACAATGC            |            |
| TPI1                                                                                                                                                                                                                                                                                                                                                                                                    | NM_001013589.3   | F: GCAGAGGGACTTGAGGTGAT<br>R: ATAGGCCAAGACAACCTTGC            |            |
| GAPDH                                                                                                                                                                                                                                                                                                                                                                                                   | NM_001034034.2   | F:CCACATACTCAGCACCAGCATCAC<br>R: CGGCACAGTCAAGGCAGAGAAC       | [23]       |
| PGK1                                                                                                                                                                                                                                                                                                                                                                                                    | NM_001034299.1   | F:GCACAGCAAGTAGCAGTGTCTCC<br>R:GCCCTTATGGATGAGGTGGTGAAG       |            |
| PGAM1                                                                                                                                                                                                                                                                                                                                                                                                   | NM_001034054.1   | F: GGGAAACGGGTACTAATTGC<br>R: GCAGGTTCACTCCATGATA             |            |
| ENO1                                                                                                                                                                                                                                                                                                                                                                                                    | NM_174049.2      | F:TGAGAGCCACCGTTGATGACATTG<br>R:CAAGGCTGGTGCTGTGGAGAAG        | [23]       |
| PKM                                                                                                                                                                                                                                                                                                                                                                                                     | NM_001205727.1   | F:CTTACACACCACAGGGAAGATGCC<br>R:GCCATAATCGTCCTCACCAAGTCTG     |            |
| LDHA                                                                                                                                                                                                                                                                                                                                                                                                    | NM_174099.2      | F: TTGGTCCAGCGTAACGTGAACATC<br>R: AAGCCACTTATCTTCCAAGCCACATAG |            |
| LDHB                                                                                                                                                                                                                                                                                                                                                                                                    | NM_174100.2      | F: CTCCTCCCTCCTTGCGGAT<br>R: AGAGTTGCCATTGTGCCAG              |            |
| SCD1 stearoyl-CoA desaturase 1, PGLS 6-phosphogluconolactonase, PFKL phosphofructokinase, liver type, ALDOA aldolase, fructose-bisphosphate A, TPI1 triosephosphate isomerase 1, GAPDH glyceraldehyde-3-phosphate dehydrogenase, PGK1 phosphoglycerate kinase 1, PGAM1 phosphoglycerate mutase 1, ENO1 enolase 1, PKM pyruvate kinase M1/2, LDHA lactate dehydrogenase A, LDHB lactate dehydrogenase B. |                  |                                                               |            |

**Supplementary Table S2.** The sequences of scrambled and specific siRNA.

| Gene name |          | Specific siRNA sequences | References |
|-----------|----------|--------------------------|------------|
| PGLS      | Scramble | CCTACGCCACCAATTTTCGT     | [20]       |
|           | siRNA1   | UCUCCAAGCUCCCUAUCUUTT    |            |
|           | siRNA2   | GCAAGGCAGCUAUUCUGAATT    |            |
|           | siRNA3   | GGAAACUUUGCUGGUUUCUTT    |            |
| PFKL      | siRNA1   | GGUCCCGCCUCAACAUAUUTT    |            |
|           | siRNA2   | GCGGGAGCUUUGAGAACAATT    |            |
|           | siRNA3   | CCACAGAGUUCUGUACAATT     |            |
| ALDOA     | siRNA1   | CCGAGAACACUGAGGAGAATT    |            |
|           | siRNA2   | CCCAGGAAGAAUACGUCAATT    |            |
|           | siRNA3   | CCUACGCCACCAAUUUCGUTT    |            |
| TPI1      | siRNA1   | GGACUUGGAGUGAUUGCCUTT    |            |
|           | siRNA2   | GCAGAUAAACGUGAAGGAUUTT   |            |
|           | siRNA3   | CCUCAAGCCUGAGUUCGUUTT    |            |
| GAPDH     | siRNA1   | GGUCUACAUGUUCCAGUAUTT    |            |
|           | siRNA2   | GCAUCGUGGAGGGACUUAUTT    |            |
|           | siRNA3   | CCAAGUAUGAUGAGAUAATT     |            |
| PGK1      | siRNA1   | CCAAGUCAGUUGUUCUUAUTT    |            |
|           | siRNA2   | GCUCCAUGGUAGGAGUAAATT    |            |
|           | siRNA3   | CCUGGAAGGUAAAGUGCUUTT    |            |
| PGAM1     | siRNA1   | CCTACGCCACCAATTTTCGT     | [20]       |
|           | siRNA2   | GCACATGGAACCTGGAGAA      |            |
|           | siRNA3   | TCTATGAGTTGGACAAGAA      |            |
|           | siRNA1   | GCGCUUCAACUGGAAUCUATT    |            |
| ENO1      | siRNA2   | GCAUCGGAGCAGAGGUUUATT    |            |
|           | siRNA3   | GCUGAAAGUGAACCAGAUUTT    |            |
|           | siRNA1   | GGAAAGAACAUCAAGAUAAATT   |            |
| PKM       | siRNA2   | GGAAUGAAUGUGGCUCGUUTT    |            |
|           | siRNA3   | GGGUGAACUUGGCCAUGAATT    |            |
|           | siRNA1   | GCUGAUUCAGAAUCUUCUUTT    |            |
| LDHA      | siRNA2   | GCAAACUCCAGGCUGGUUATT    |            |
|           | siRNA3   | GCCGAUUUGGCAGAAAGUATT    |            |
|           | siRNA1   | CCUGAAUGCUCGAGGGUUATT    |            |
| LDHB      | siRNA2   | GCCAUCAGCAUUCUGGGAATT    |            |
|           | siRNA3   | GCUAGAUUUCGCUACCUUATT    |            |

**Supplementary Table S3.** Reaction system of real-time PCR.

| Component               | Volume (μL) |
|-------------------------|-------------|
| cDNA                    | 2           |
| Forward Primer(10pM/μL) | 0.6         |
| Reverse Primer(10pM/μL) | 0.6         |
| 2×Talent qPCR PreMix    | 10          |
| 50×ROX Reference Dye△   | 2           |
| RNase-Free ddH2O        | 4.8         |
| Total                   | 20          |

**Supplementary Table S4.** Fluorescence quantitative reaction procedure.

| Phase               | Cycle | Temperature | Time  | Content             | Fluorescence<br>signal<br>acquisition |
|---------------------|-------|-------------|-------|---------------------|---------------------------------------|
| Pre<br>degeneration | 1×    | 95℃         | 3min  | Pre degeneration    | No                                    |
| PCR reaction        | 40×   | 95℃         | 5sec  | Transgender         | No                                    |
|                     |       | 60℃         | 15sec | Annealing/extension | Yes                                   |

**Supplementary Table S5.** The proteins involved in glycolysis pathway screened from the tandem mass tag-based quantitative proteomics analysis.

| Protein accession | Protein description                                       | Gene name |
|-------------------|-----------------------------------------------------------|-----------|
| NP_001013607.1    | triosephosphate isomerase                                 | TPI1      |
| NP_001019695.2    | triokinase/FMN cyclase                                    | TKFC      |
| NP_001029226.1    | phosphoglycerate mutase 1                                 | PGAM1     |
| NP_001029874.1    | beta-enolase                                              | ENO3      |
| NP_001030213.1    | galactose-1-phosphate uridylyltransferase                 | GALT      |
| NP_001030361.1    | mannose-6-phosphate isomerase                             | MPI       |
| NP_001035642.1    | glyceraldehyde-3-phosphate dehydrogenase, testis-specific | GAPDHS    |
| NP_001070371.1    | phosphoglucomutase-1                                      | PGM1      |
| NP_001073713.1    | ATP-dependent 6-phosphofructokinase, liver type           | PFKL      |
| NP_001092851.1    | galactokinase                                             | GALK1     |
| NP_001094595.1    | gamma-enolase                                             | ENO2      |
| NP_001095385.1    | fructose-bisphosphate aldolase A                          | ALDOA     |
| NP_001116507.1    | phosphoglycerate kinase 2                                 | PGK2      |
| NP_001180149.1    | ATP-dependent 6-phosphofructokinase, platelet type        | PFKP      |
| NP_001193137.1    | UDP-glucose 4-epimerase                                   | GALE      |
| NP_776524.1       | L-lactate dehydrogenase A chain                           | LDHA      |
| NP_777237.3       | 6-phosphofructo-2-kinase/fructose-2,6-bisphosphatase 2    | PFKFB2    |
| NP_001091453.1    | fructose-bisphosphate aldolase C                          | ALDOC     |
| NP_001029206.1    | glyceraldehyde-3-phosphate dehydrogenase                  | GAPDH     |
| NP_001029421.1    | alcohol dehydrogenase class-3                             | ADH5      |
| NP_001029471.1    | phosphoglycerate kinase 1                                 | PGK1      |
| NP_001029967.1    | aldose 1-epimerase                                        | GALM      |
| NP_001069981.1    | alcohol dehydrogenase [NADP(+)]                           | AKR1A1    |
| NP_001192656.1    | pyruvate kinase PKM                                       | PKM       |
| NP_776474.2       | alpha-enolase                                             | ENO1      |
| NP_776525.2       | l-lactate dehydrogenase B chain isoform LDHB              | LDHB      |

**Supplementary Table S6.** The proteins involved in nucleotide catabolism pathway screened from the tandem mass tag-based quantitative proteomics analysis.

| Protein accession | Protein description                                                         | Gene name |
|-------------------|-----------------------------------------------------------------------------|-----------|
| NP_001013607.1    | triosephosphate isomerase                                                   | TPI1      |
| NP_001029207.1    | hypoxanthine-guanine phosphoribosyltransferase                              | HPRT1     |
| NP_001029226.1    | phosphoglycerate mutase 1                                                   | PGAM1     |
| NP_001029874.1    | beta-enolase                                                                | ENO3      |
| NP_001030213.1    | galactose-1-phosphate uridylyltransferase                                   | GALT      |
| NP_001069150.2    | cytosolic acyl coenzyme A thioester hydrolase                               | ACOT7     |
| NP_001069496.1    | deoxyribose-phosphate aldolase                                              | DERA      |
| NP_001070371.1    | phosphoglucomutase-1                                                        | PGM1      |
| NP_001073713.1    | ATP-dependent 6-phosphofructokinase, liver type                             | PFKL      |
| NP_001091453.1    | fructose-bisphosphate aldolase C                                            | ALDOC     |
| NP_001094595.1    | gamma-enolase                                                               | ENO2      |
| NP_001095385.1    | fructose-bisphosphate aldolase A                                            | ALDOA     |
| NP_001180149.1    | ATP-dependent 6-phosphofructokinase, platelet type                          | PFKP      |
| NP_001193137.1    | UDP-glucose 4-epimerase                                                     | GALE      |
| NP_776397.1       | xanthine dehydrogenase/oxidase                                              | XDH       |
| NP_776524.1       | L-lactate dehydrogenase A chain                                             | LDHA      |
| NP_776830.1       | cytosolic purine 5'-nucleotidase                                            | NT5C2     |
| NP_776842.1       | cGMP-specific 3',5'-cyclic phosphodiesterase                                | PDE5A     |
| NP_001007819.1    | purine nucleoside phosphorylase                                             | EDIP      |
| NP_001019695.2    | triokinase/FMN cyclase                                                      | TKFC      |
| NP_001030361.1    | mannose-6-phosphate isomerase                                               | MPI       |
| NP_001033291.1    | dCTP pyrophosphatase 1                                                      | DCTPP1    |
| NP_001075935.1    | diphosphoinositol polyphosphate phosphohydrolase 1                          | NUDT3     |
| NP_001092851.1    | galactokinase                                                               | GALK1     |
| NP_001116507.1    | phosphoglycerate kinase 2                                                   | PGK2      |
| NP_777237.3       | 6-phosphofructo-2-kinase/fructose-2,6-bisphosphatase 2                      | PFKFB2    |
| NP_787006.1       | histidine triad nucleotide-binding protein 1                                | HINT1     |
| NP_001029486.1    | N-acetyl-D-glucosamine kinase                                               | NAGK      |
| NP_001030267.1    | phosphomannomutase 2                                                        | PMM2      |
| NP_001039869.1    | UDP-N-acetylhexosamine pyrophosphorylase                                    | UAP1      |
| NP_001039947.1    | sialic acid synthase                                                        | NANS      |
| NP_001070351.1    | glutamine--fructose-6-phosphate aminotransferase [isomerizing] 2            | GFPT2     |
| NP_001073756.2    | glucosamine-6-phosphate isomerase 1                                         | GNPDA1    |
| NP_001073800.1    | GDP-mannose 4,6 dehydratase                                                 | GMDS      |
| NP_001103431.1    | glutamine--fructose-6-phosphate aminotransferase [isomerizing] 1            | GFPT1     |
| NP_001178072.2    | bifunctional UDP-N-acetylglucosamine 2-epimerase/N-acetylmannosamine kinase | GNE       |
| NP_001193104.1    | mannose-1-phosphate guanylyltransferase alpha                               | GMPPA     |
| NP_776637.1       | UTP-glucose-1-phosphate uridylyltransferase                                 | UGP2      |

**Supplementary Table S7.** The proteins involved in other energy metabolism pathway screened from the tandem mass tag-based quantitative proteomics analysis.

| Biological processes      | Protein accession | Protein description                                       | Gene name |
|---------------------------|-------------------|-----------------------------------------------------------|-----------|
| Monosaccharide catabolism | NP_001029874.1    | beta-enolase                                              | ENO3      |
|                           | NP_001030213.1    | galactose-1-phosphate uridylyltransferase                 | GALT      |
|                           | NP_001035642.1    | glyceraldehyde-3-phosphate dehydrogenase, testis-specific | GAPDHS    |
|                           | NP_001069981.1    | alcohol dehydrogenase [NADP(+)]                           | AKR1A1    |
|                           | NP_001070371.1    | phosphoglucomutase-1                                      | PGM1      |
|                           | NP_001073713.1    | ATP-dependent 6-phosphofructokinase, liver type           | PFKL      |
|                           | NP_001091453.1    | fructose-bisphosphate aldolase C                          | ALDOC     |
|                           | NP_001091548.1    | ribulose-phosphate 3-epimerase                            | RPE       |
|                           | NP_001094595.1    | gamma-enolase                                             | ENO2      |
|                           | NP_001180149.1    | ATP-dependent 6-phosphofructokinase, platelet type        | PFKP      |
|                           | NP_001193137.1    | UDP-glucose 4-epimerase                                   | GALE      |
|                           | NP_776524.1       | l-lactate dehydrogenase A chain                           | LDHA      |
|                           | NP_001003906.1    | transketolase                                             | TKT       |
|                           | NP_001030360.2    | transaldolase                                             | TALDO1    |
|                           | NP_001033669.1    | 6-phosphogluconolactonase                                 | PGLS      |
|                           | NP_001069496.1    | deoxyribose-phosphate aldolase                            | DERA      |
|                           | NP_001070371.1    | phosphoglucomutase-1                                      | PGM1      |
| Pentose phosphate pathway | NP_001073713.1    | ATP-dependent 6-phosphofructokinase, liver type           | PFKL      |
|                           | NP_001091548.1    | ribulose-phosphate 3-epimerase                            | RPE       |
|                           | NP_001095385.1    | fructose-bisphosphate aldolase A                          | ALDOA     |
|                           | NP_001107624.1    | ribose-phosphate pyrophosphokinase 2                      | PRPS2     |
|                           | NP_001137210.1    | 6-phosphogluconate dehydrogenase, decarboxylating         | PGD       |
|                           | NP_001180149.1    | ATP-dependent 6-phosphofructokinase, platelet type        | PFKP      |

**Supplementary Table S8.** The proteins involved in fat metabolism pathway screened from the tandem mass tag-based quantitative proteomics analysis.

| Biological processes                        | Protein accession | Protein description                                  | Gene name |
|---------------------------------------------|-------------------|------------------------------------------------------|-----------|
| Lipid-related Acyl-CoA biological processes | NP_001040062.1    | elongation of very long chain fatty acids protein 5  | ELOVL5    |
|                                             | NP_001095625.1    | elongation of very long chain fatty acids protein 6  | ELOVL6    |
|                                             | NP_776579.1       | palmitoyl-protein thioesterase 1 precursor           | PPT1      |
| Lipoprotein catabolism                      | NP_001160002.1    | low-density lipoprotein receptor precursor           | LDLR      |
|                                             | NP_776579.1       | palmitoyl-protein thioesterase 1 precursor           | PPT1      |
| Sphingolipid catabolism                     | NP_776579.1       | palmitoyl-protein thioesterase 1 precursor           | PPT1      |
|                                             | NP_001039814.1    | alpha-N-acetylgalactosaminidase precursor            | NAGA      |
| Fatty acid elongase activity                | NP_001040062.1    | elongation of very long chain fatty acids protein 5  | ELOVL5    |
|                                             | NP_001095625.1    | elongation of very long chain fatty acids protein 6  | ELOVL6    |
|                                             | NP_001040062.1    | elongation of very long chain fatty acids protein 5  | ELOVL5    |
| Fatty acid extension pathway                | NP_001095625.1    | elongation of very long chain fatty acids protein 6  | ELOVL6    |
|                                             | NP_776579.1       | palmitoyl-protein thioesterase 1 precursor           | PPT1      |
|                                             | NP_001040062.1    | elongation of very long chain fatty acids protein 5  | ELOVL5    |
|                                             | NP_001095625.1    | elongation of very long chain fatty acids protein 6  | ELOVL6    |
| Biosynthesis of UFA                         | NP_001096786.1    | very-long-chain (3R)-3-hydroxyacyl-CoA dehydratase 3 | HACD3     |
|                                             | NP_776384.3       | stearoyl-coenzyme A desaturase                       | SCD1      |
